# Supplementary material for: Enhancement of thermal conductivity in polyamide-6/graphene composites via a “bridge effect” of silicon carbide whiskers
Source: Royal Society of Chemistry journal article supplement (doi:10.1039/c7ra09094c), 2017-01-01
Supplement: c7ra09094c1.pdf [file c7ra09094c1.pdf]

Supplementary Material

## Enhancement of thermal conductivity in polyamide-6/graphene composites via “Bridge Effect” of silicon carbide whiskers

Na Song,<sup>\*‡</sup> Haidong Pan,<sup>‡</sup> Xinghuang Hou, Siqi Cui, Liyi Shi, and Peng Ding<sup>\*</sup>

Research Center of Nanoscience and Nanotechnology, Shanghai University, 99 Shangda Road,  
Shanghai 200444, P.R. China

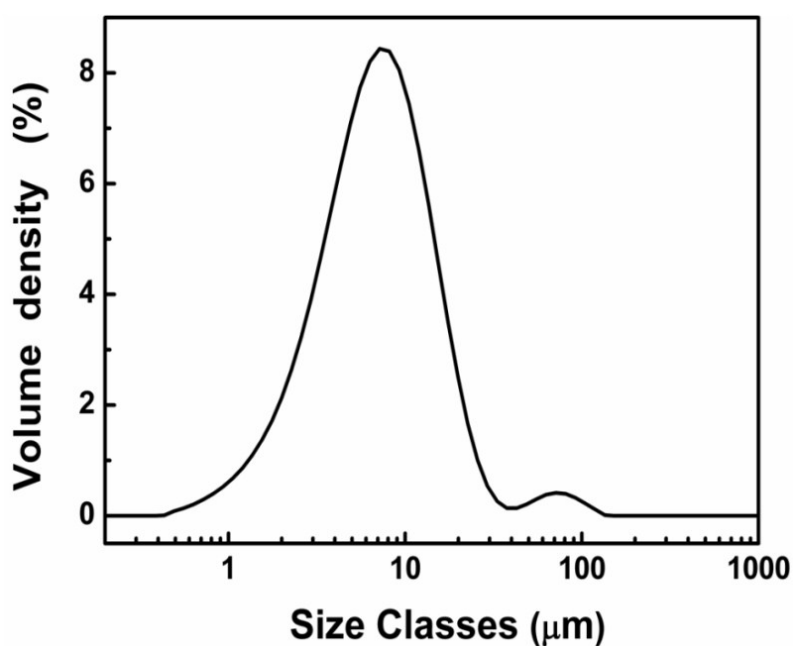

Fig. S1 The particle size distribution of the graphene nanosheets

---

\* Corresponding author: E-mail: snlxf@shu.edu.cn (N. Song), dingpeng@shu.edu.cn (P.Ding).

‡ These authors contributed equally to this work.

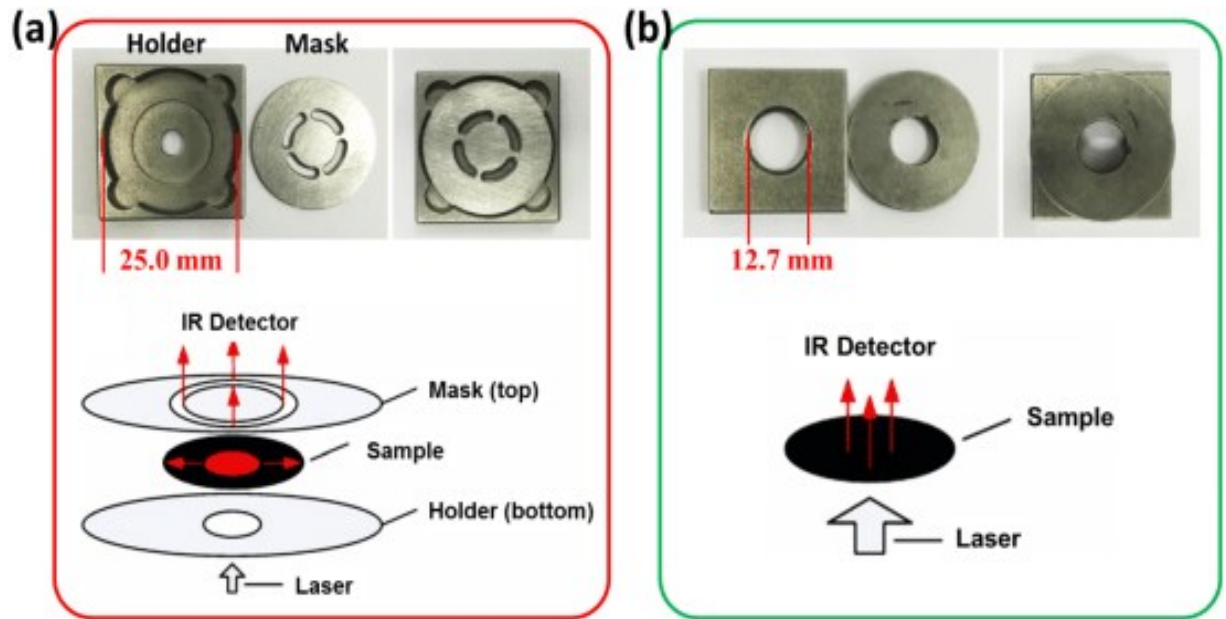

Fig. S2 The test model of TC (a)  $\lambda_x$  test model; (b)  $\lambda_z$  test model.

Table S1 The TC of the PG composites

| Substance | $\lambda_x$ ( $\text{W}\cdot\text{m}^{-1}\cdot\text{K}^{-1}$ ) | Standard deviation | $\lambda_z$ ( $\text{W}\cdot\text{m}^{-1}\cdot\text{K}^{-1}$ ) | Standard deviation |
|-----------|----------------------------------------------------------------|--------------------|----------------------------------------------------------------|--------------------|
| PA        | 2.98                                                           | 0.084              | 0.38                                                           | 0.0201             |
| PG-0.1    | 3.84                                                           | 0.093              | 0.46                                                           | 0.0273             |
| PG-0.5    | 6.92                                                           | 0.105              | 0.49                                                           | 0.0206             |
| PG-1      | 7.108                                                          | 0.131              | 0.47                                                           | 0.0176             |
| PG-2      | 7.109                                                          | 0.088              | 0.52                                                           | 0.0085             |
| PG-3      | 7.81                                                           | 0.130              | 0.55                                                           | 0.0308             |

Table S2 The TC of the PASC composites

| Substance | $\lambda_x$ ( $\text{W}\cdot\text{m}^{-1}\cdot\text{K}^{-1}$ ) | Standard deviation | $\lambda_z$ ( $\text{W}\cdot\text{m}^{-1}\cdot\text{K}^{-1}$ ) | Standard deviation |
|-----------|----------------------------------------------------------------|--------------------|----------------------------------------------------------------|--------------------|
| PASC-0    | 7.55                                                           | 0.149              | 1.38                                                           | 0.067              |
| PASC-24   | 7.49                                                           | 0.085              | 1.55                                                           | 0.164              |
| PASC-8    | 7.80                                                           | 0.044              | 1.85                                                           | 0.071              |

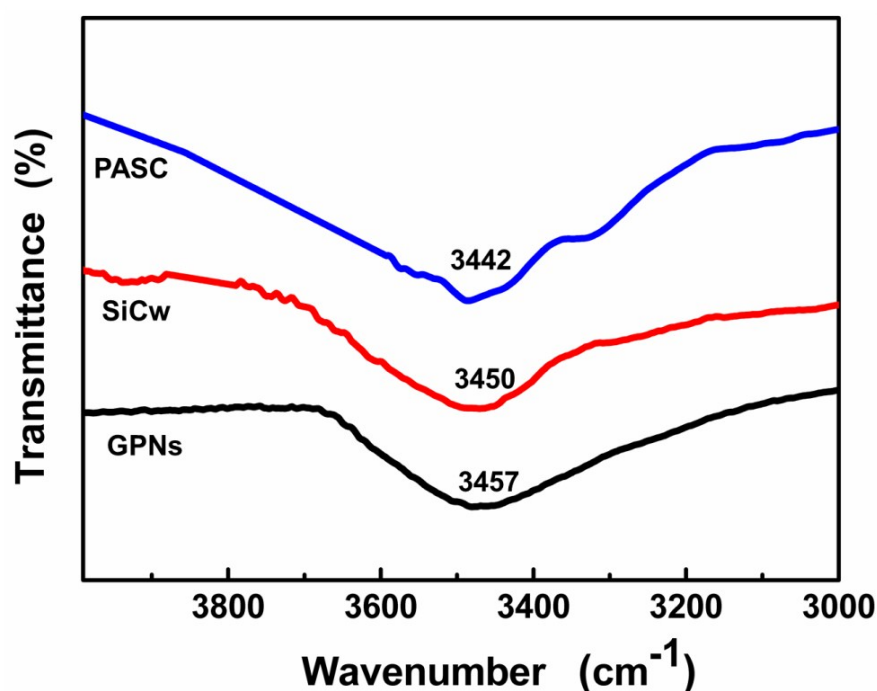

Fig. S3 FTIR spectra of the graphene nanosheets, SiCw and PASC composites at wavenumbers 3100–3500cm<sup>-1</sup> showing the vibration of –OH groups.

From the FTIR spectra, there is a wide and blunt peak in the 3400 cm<sup>-1</sup> around, which is caused by H<sub>2</sub>O or hydrogen bonds formed by the hydroxyl groups that are associated with each other<sup>1, 2</sup>. In this work, we dried the test sample with a dryer for a long time to prevent the interference of water on the test. In conclusion, the Graphene nanosheets and SiC whiskers may formed intermolecular hydrogen bonds in the PASC composites, the combination of the two fillers will be more closely.

### Supplementing References

1. C. L. Bao, Y. Q. Guo, L. Song and Y. Hu, *Journal of Materials Chemistry*, 2011, **21**, 13942-13950.
2. Y. Chen, X. Zhang, P. Yu and Y. W. Ma, *Chemical Communications*, 2009, DOI: 10.1039/b907723e, 4527-4529.
